# Supplementary material
Source: PubMed Central journal article supplement (PMC9052873)
Supplement: NIHMS1792625-supplement-SI_2.pdf [file NIHMS1792625-supplement-SI_2.pdf]

## Supporting Information

### Structure-Based Drug Design of Bisubstrate Inhibitors of Phenylethanolamine *N*-Methyltransferase (PNMT) Possessing Low Nanomolar Affinity at Both Substrate Binding Domains

Jian Lu,<sup>†</sup> Aaron G. Bart,<sup>†</sup> Qian Wu,<sup>‡</sup> Kevin R. Criscione,<sup>†</sup> Michael J. McLeish,<sup>\*,‡</sup> Emily E. Scott,<sup>\*,†</sup> and Gary L. Grunewald<sup>\*,†</sup>

<sup>†</sup>*Department of Medicinal Chemistry, University of Kansas, Lawrence, KS 66045, ‡Department of Chemistry and Chemical Biology, Purdue School of Science, IUPUI, Indianapolis, IN 46202*

#### Table of Contents

HPLC Tracings (see Experimental for details)

|                    |     |
|--------------------|-----|
| <b>24</b> System A | S2  |
| <b>24</b> System B | S3  |
| <b>25</b> System A | S4  |
| <b>25</b> System B | S5  |
| <b>28</b> System A | S6  |
| <b>28</b> System B | S7  |
| <b>30</b> System A | S8  |
| <b>30</b> System B | S9  |
| <b>31</b> System A | S10 |
| <b>31</b> System B | S11 |

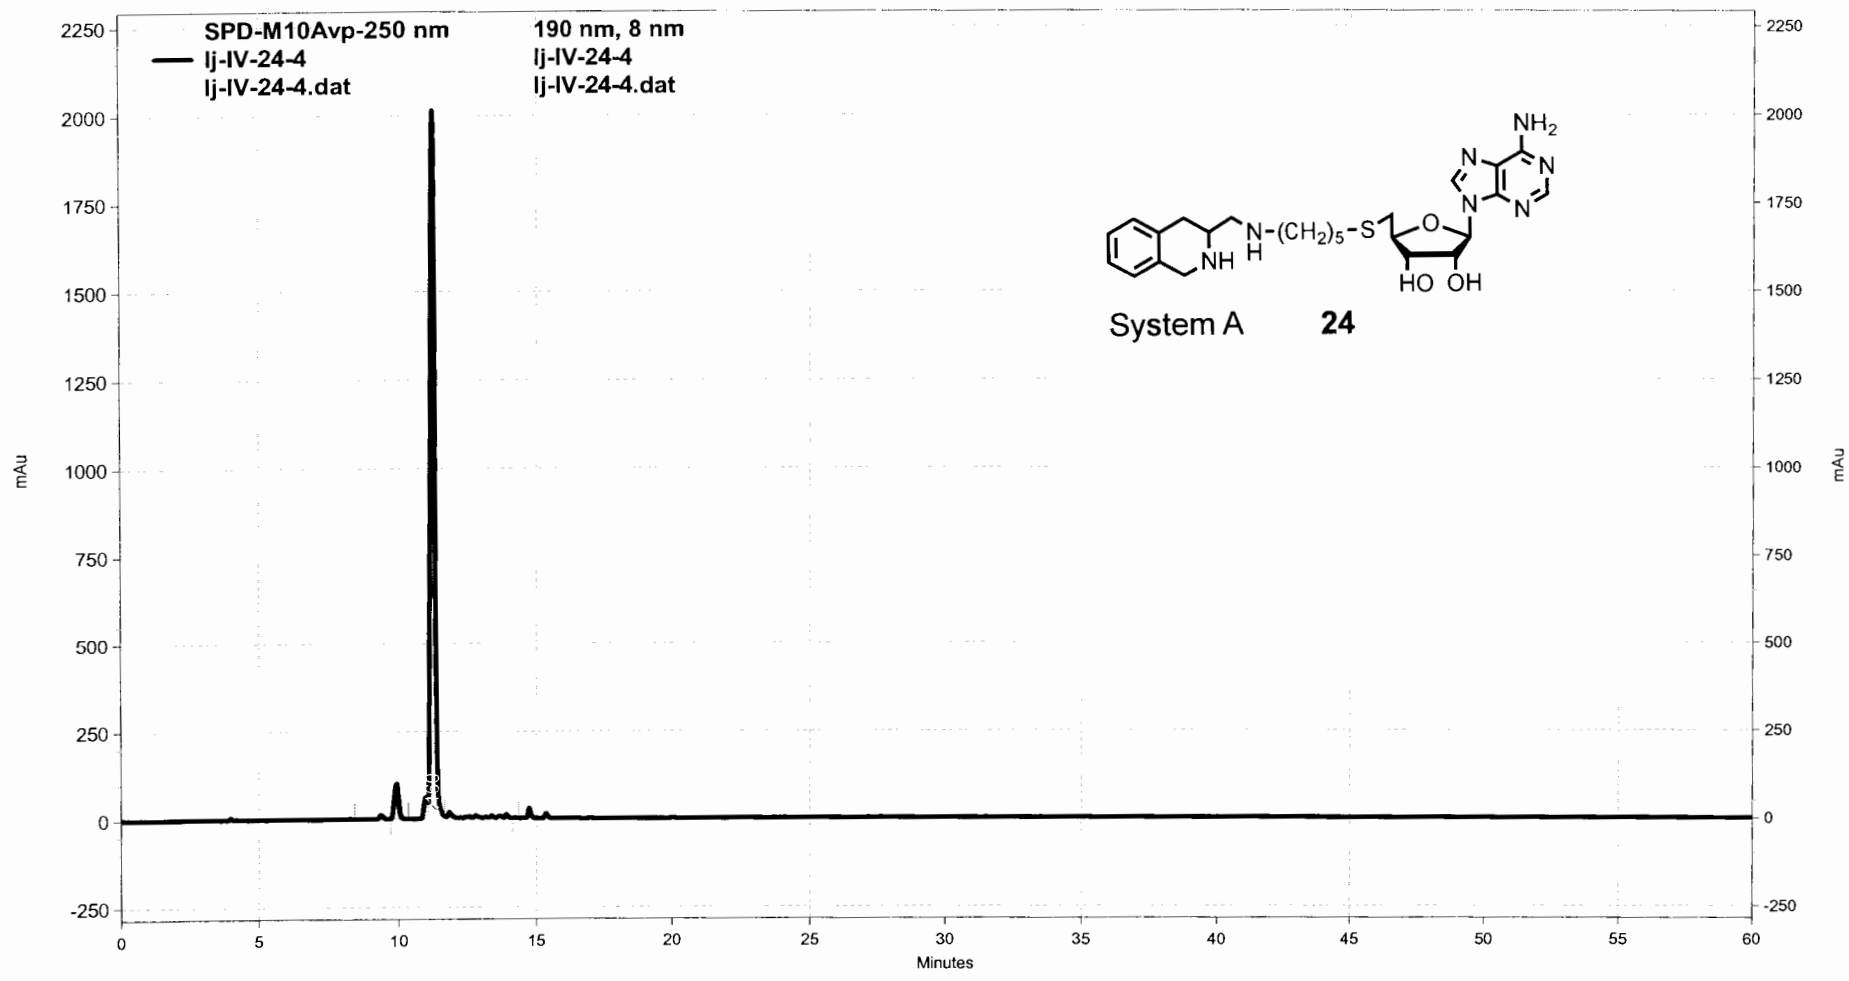

— C:\EZStart\Projects\Default\Data\Lu\lj-IV-24-4.dat, SPD-M10Avp-250 nm

C:\EZStart\Projects\Default\Data\Lu\lj-IV-24-4.dat, 190 nm, 8 nm

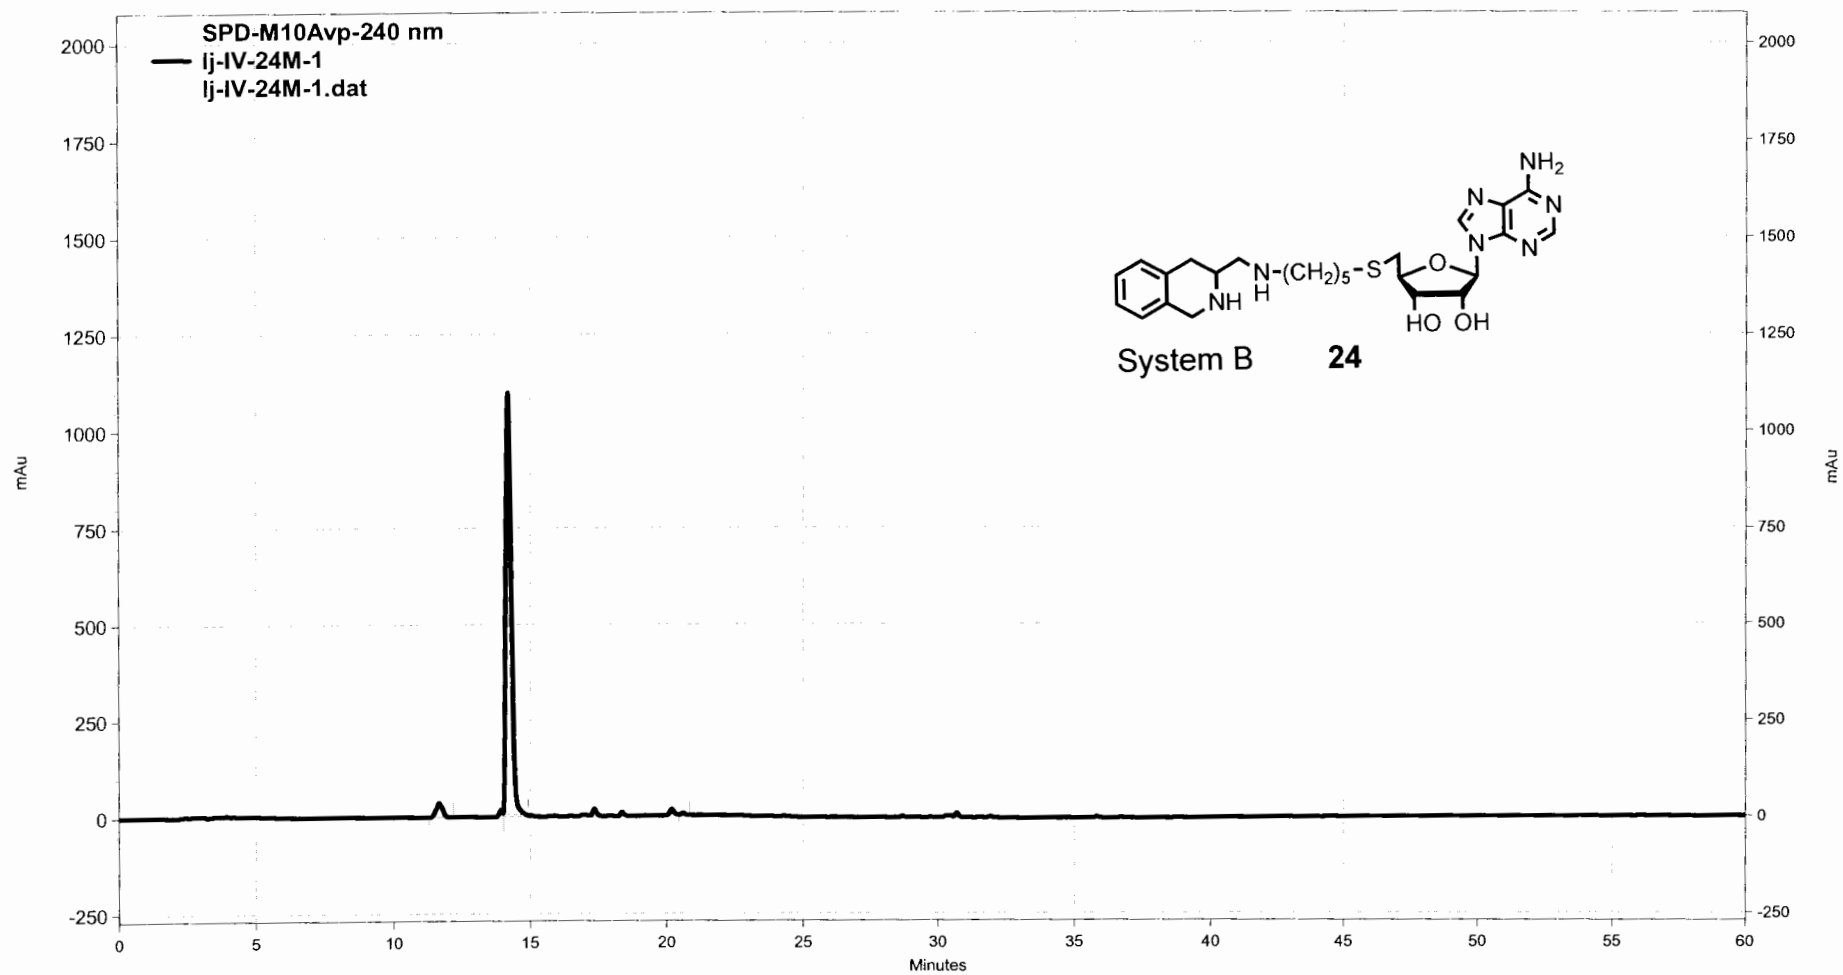

— C:\EZStart\Projects\Default\Data\Lu\lj-IV-24M-1.dat, SPD-M10Avp-240 nm

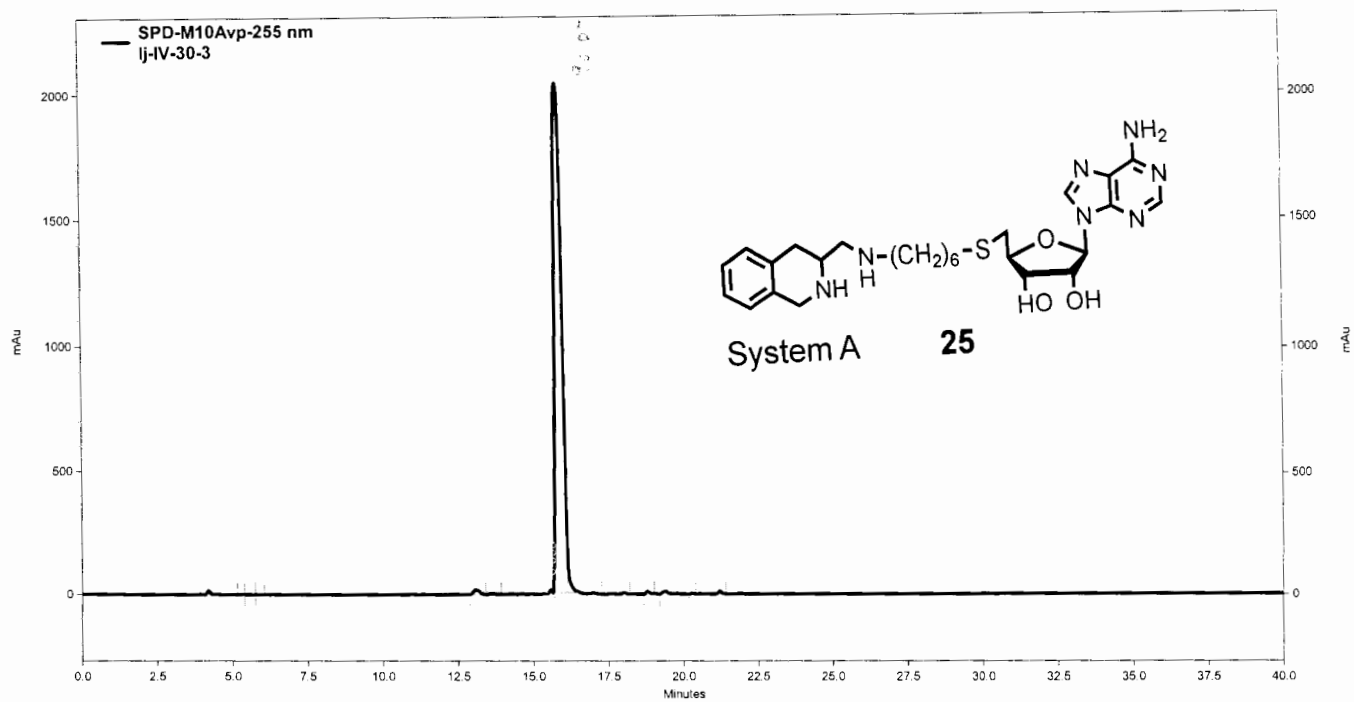

C:\EZStart\Projects\Default\Data\Lu\lj-IV-30-3.dat, SPD-M10Avp-255 nm

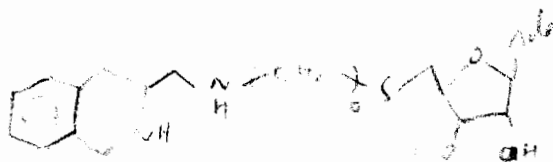

$H_2O \approx 60\% \text{ (v/v)} / CH_2Cl_2$

100/0  $\rightarrow$  0/100 in 60 mins

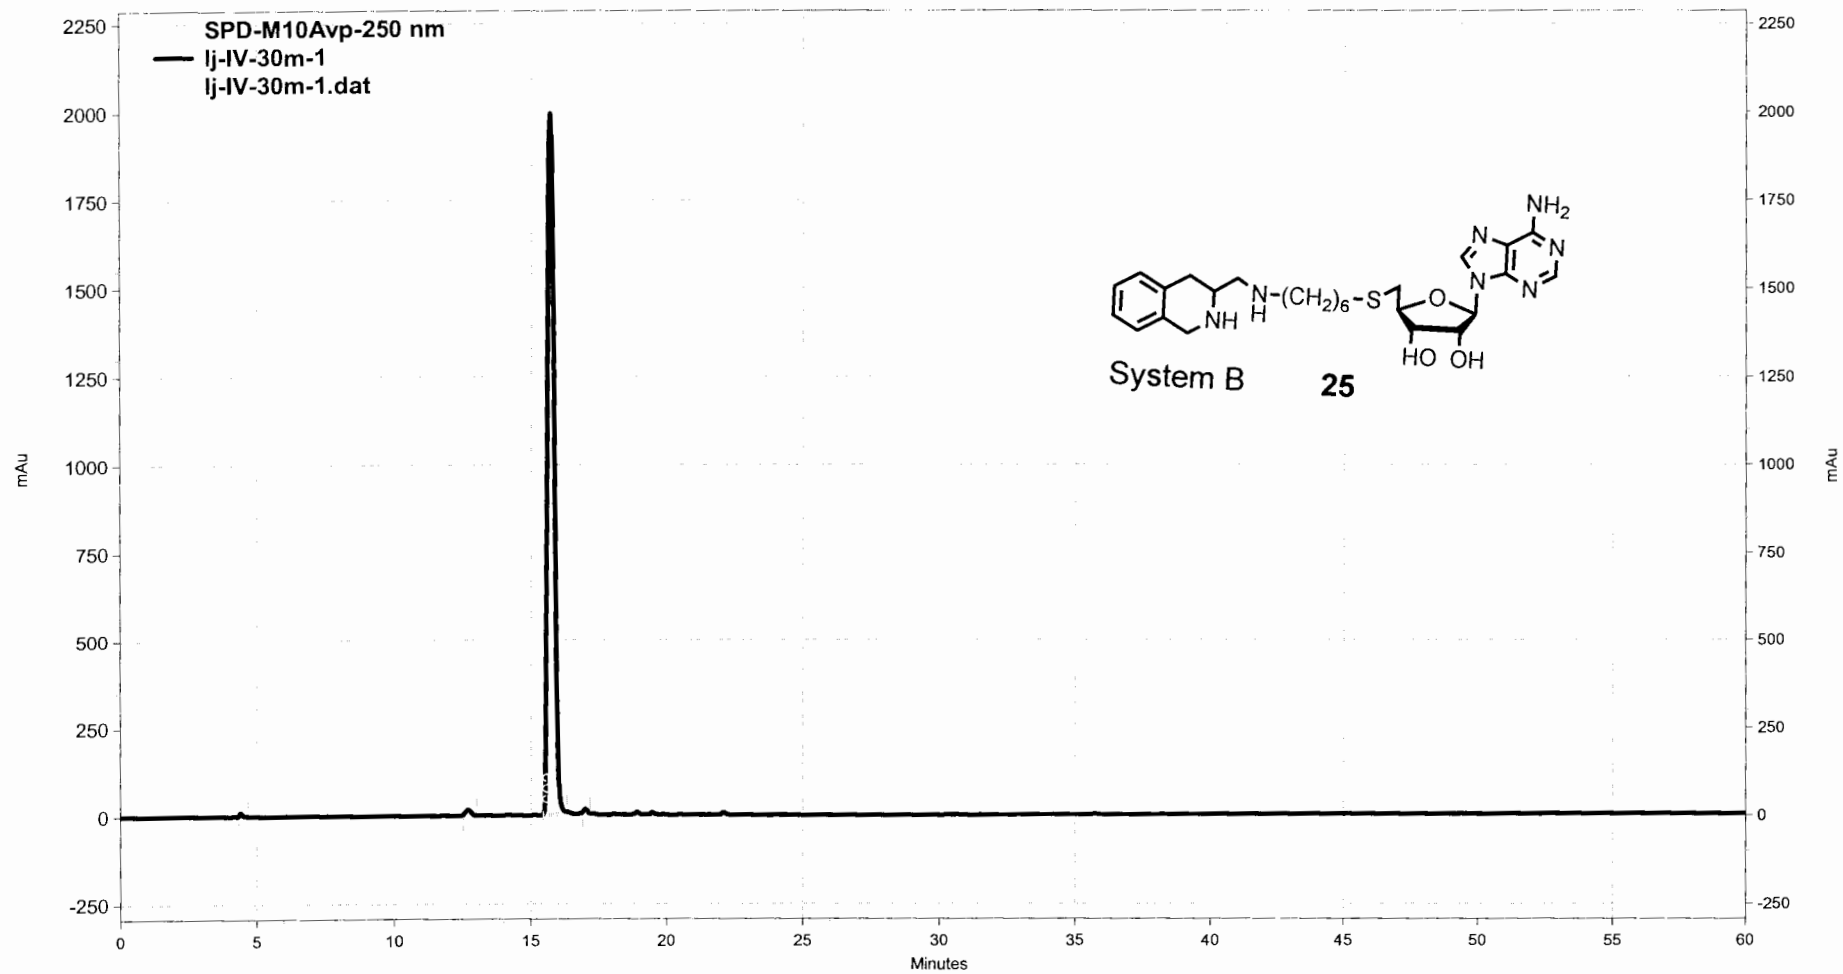

C:\EZStart\Projects\Default\Data\Lu\lj-IV-30m-1.dat, SPD-M10Avp-250 nm

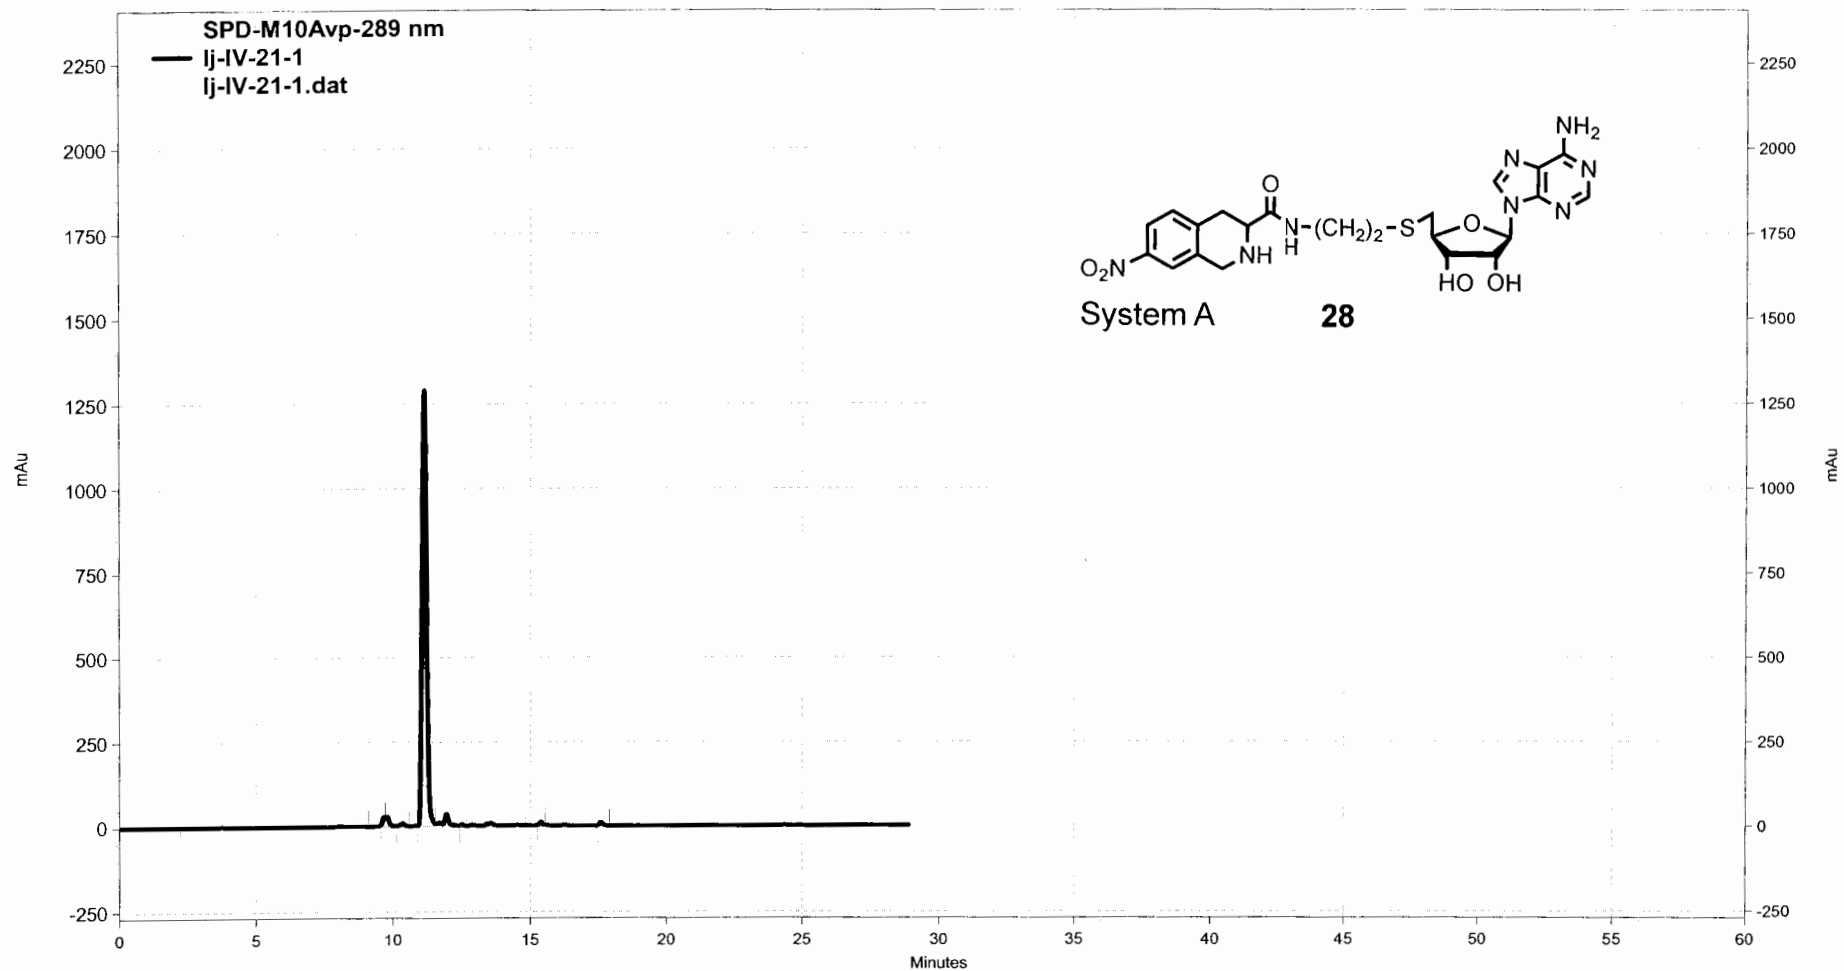

C:\EZStart\Projects\Default\Data\Lu\lj-IV-21-1.dat, SPD-M10Avp-289 nm

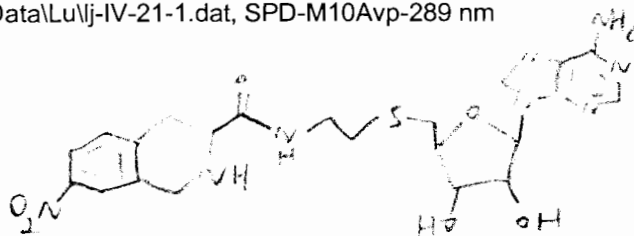

H<sub>2</sub>O (0.7% TFA) / CH<sub>2</sub>Cl<sub>2</sub>

99/1 → 1/99 in 60 min.

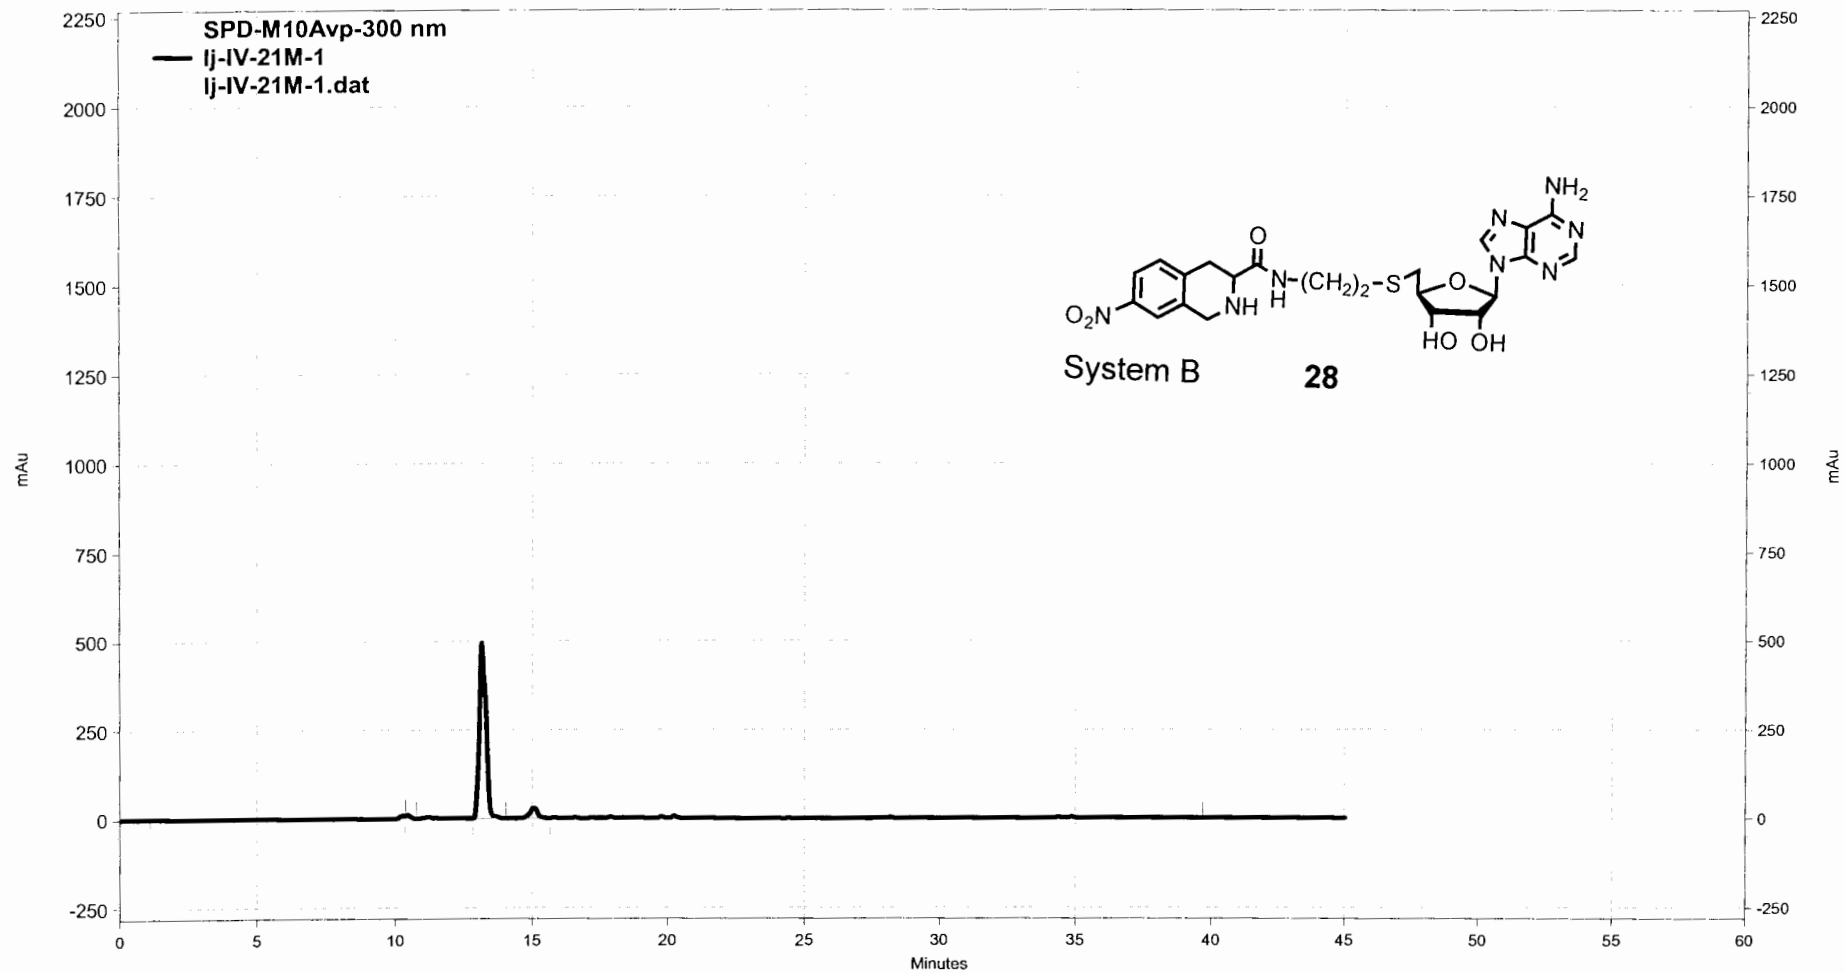

C:\EZStart\Projects\Default\Data\Lulj-IV-21M-1.dat, SPD-M10Avp-300 nm

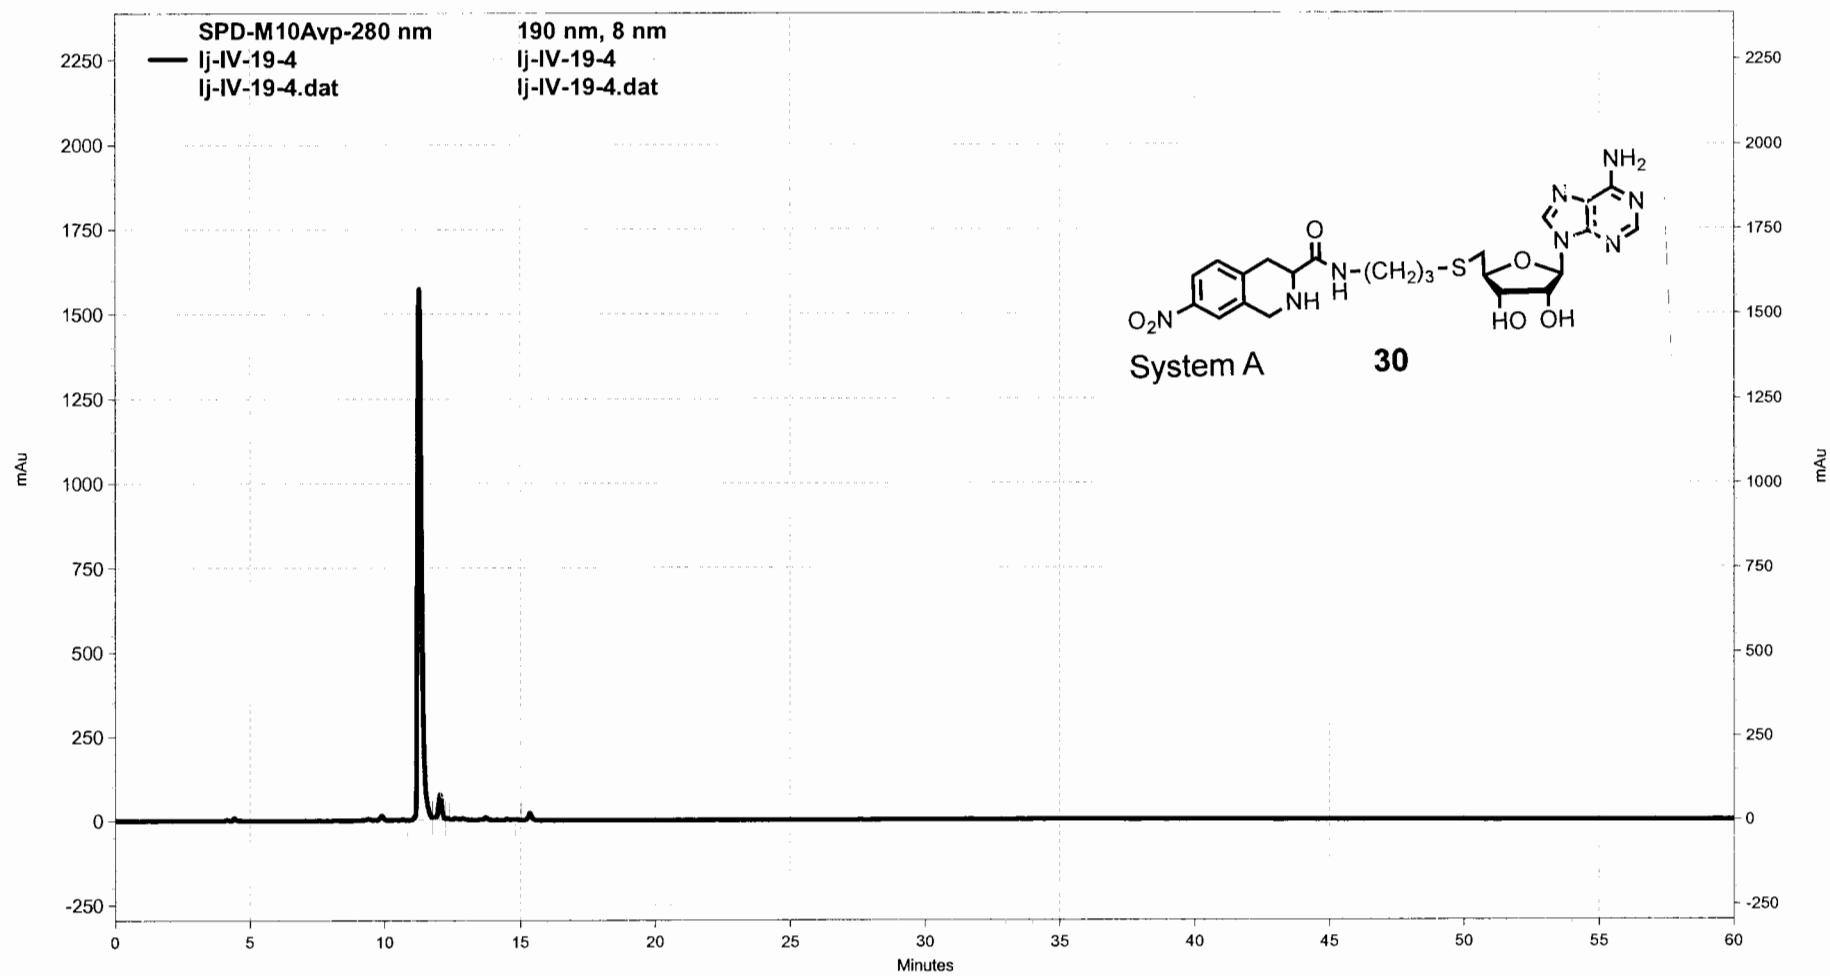

— C:\EZStart\Projects\Default\Data\Lu\lj-IV-19-4.dat, SPD-M10Avp-280 nm

— C:\EZStart\Projects\Default\Data\Lu\lj-IV-19-4.dat, 190 nm, 8 nm



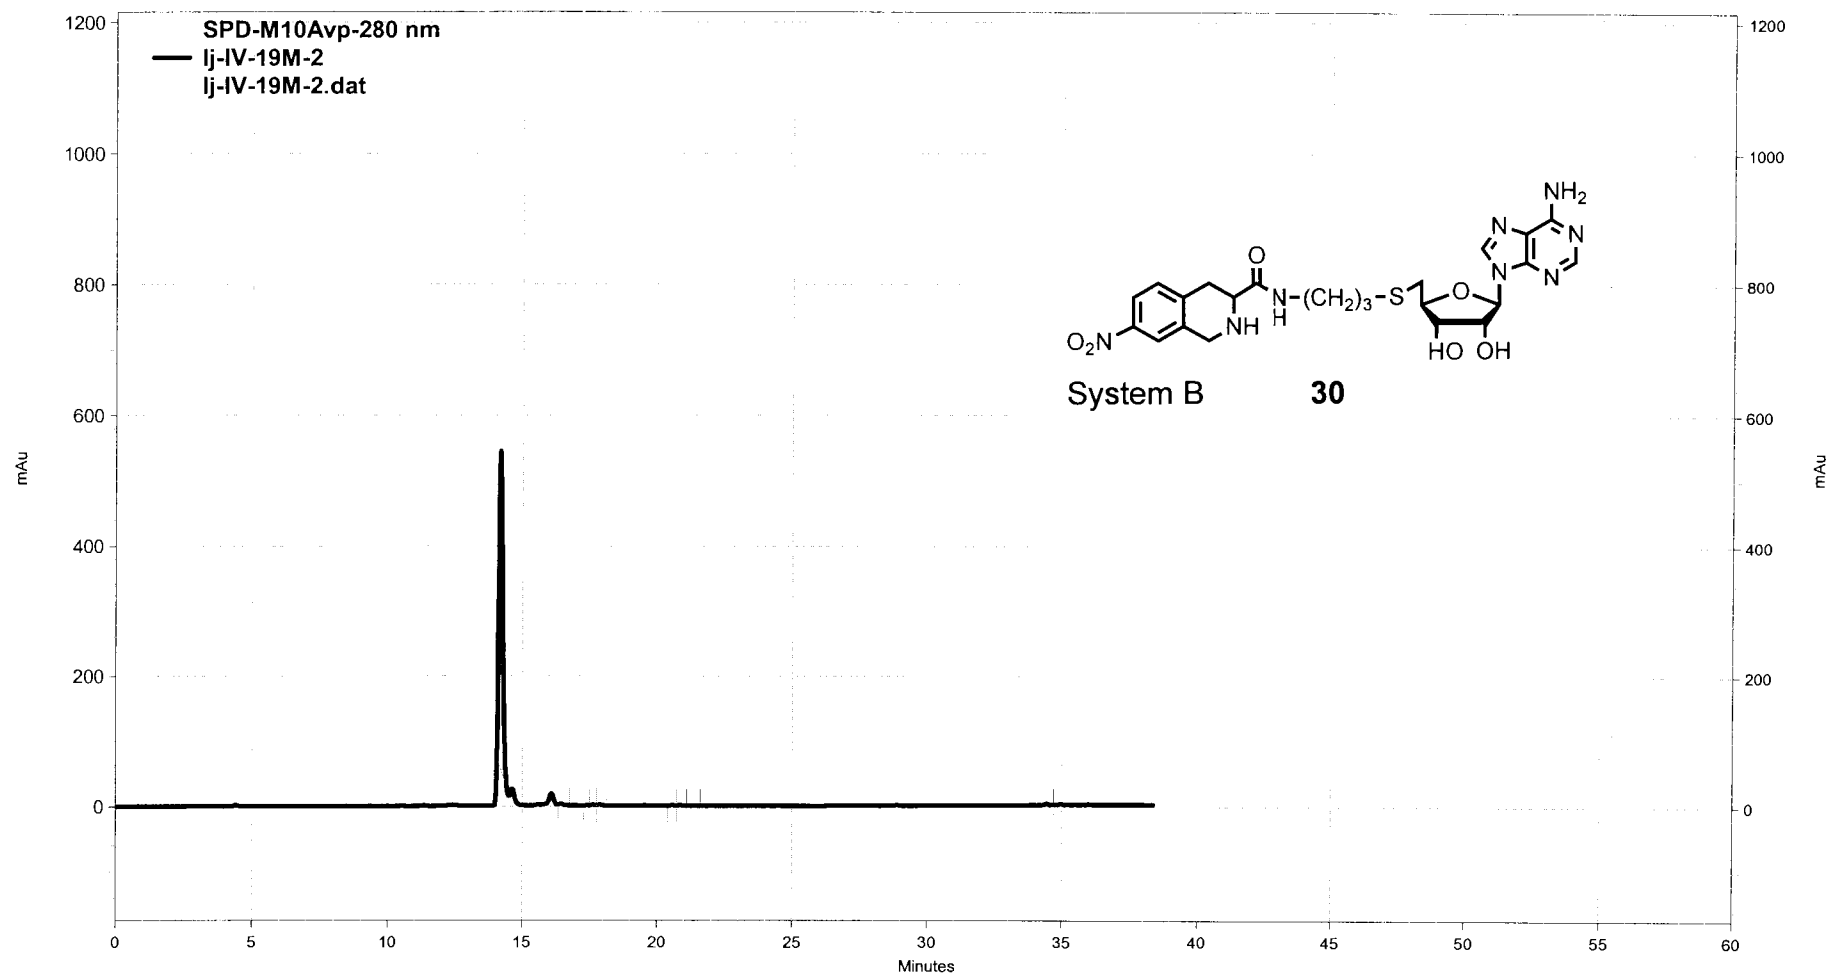

— C:\EZStart\Projects\Default\Data\Lu\lj-IV-19M-2.dat, SPD-M10Avp-280 nm

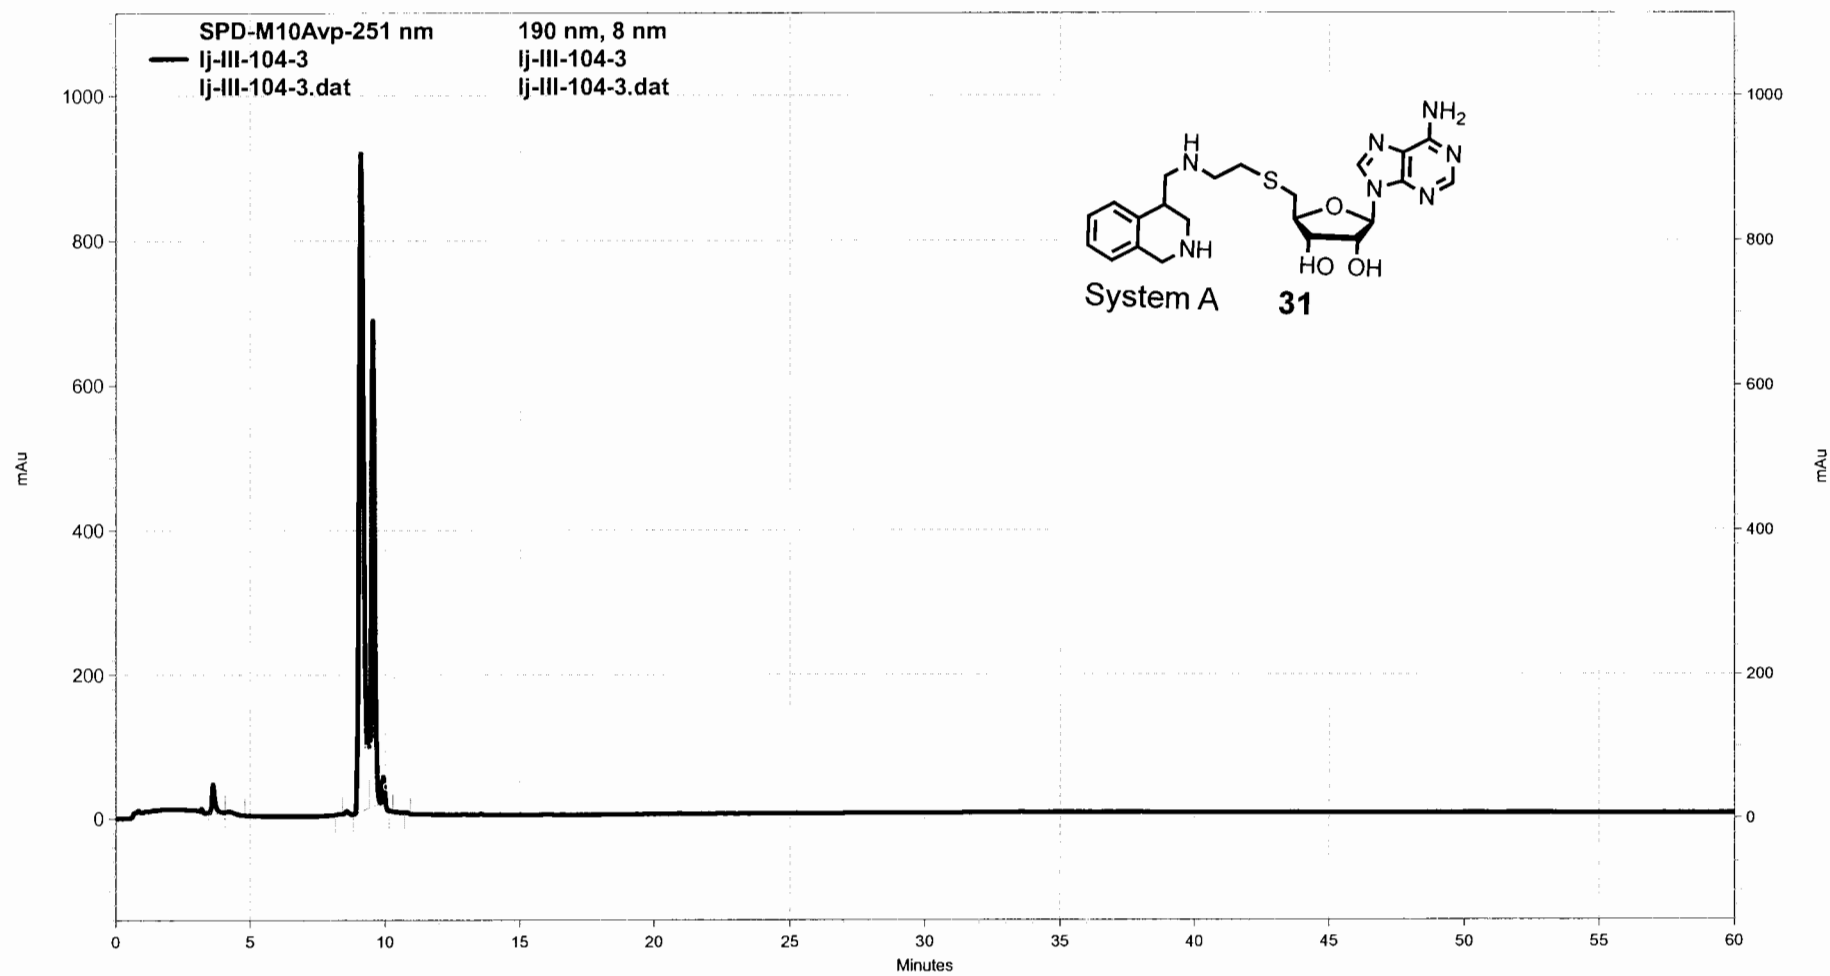

— C:\EZStart\Projects\Default\Data\Lu\lj-III-104-3.dat, SPD-M10Avp-251 nm

..... C:\EZStart\Projects\Default\Data\Lu\lj-III-104-3.dat, 190 nm, 8 nm

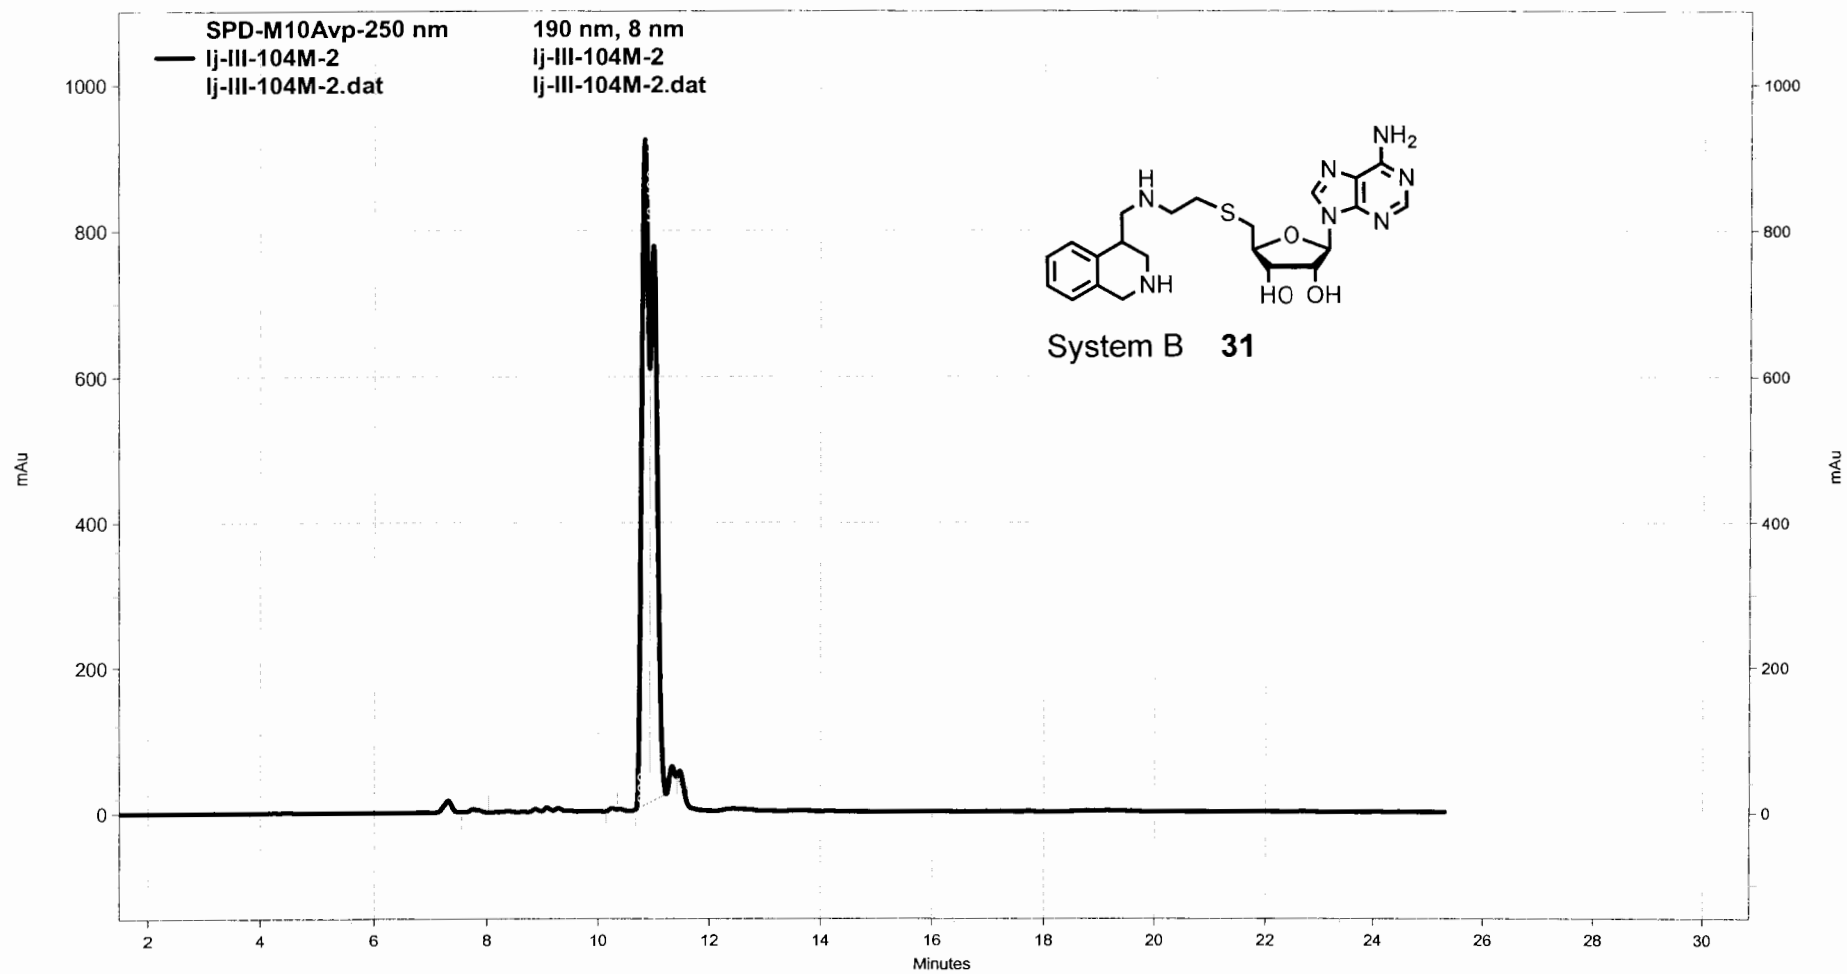

— C:\EZStart\Projects\Default\Data\Lu\lj-III-104M-2.dat, SPD-M10Avp-250 nm

C:\EZStart\Projects\Default\Data\Lu\lj-III-104M-2.dat, 190 nm, 8 nm
